## Development and Internal Validation of Models Predicting the Health Insurance Status of Participants in the German National Cohort

Authors: Ilona Hrudey<sup>1</sup>, Enno Swart<sup>1</sup>, Hansjörg Baurecht<sup>2</sup>, Heiko Becher<sup>3</sup>, Antje Damms-Machado<sup>4</sup>, Wolfgang Hoffmann<sup>5</sup>, Karl-Heinz Jöckel<sup>6</sup>, Nadja Kartschmit<sup>7</sup>, Verena Katzke<sup>8</sup>, Thomas Keil<sup>9, 10, 11</sup>, Bianca Kollhorst<sup>12</sup>, Michael Leitzmann<sup>2</sup>, Claudia Meinke-Franze<sup>5</sup>, Karin B. Michels<sup>13</sup>, Rafael Mikolajczyk<sup>14</sup>, Tobias Niedermaier<sup>8</sup>, Iris Pigeot<sup>12, 15</sup>, Sabine Schipf<sup>5</sup>, Borge Schmidt<sup>6</sup>, Barbara Walter<sup>16</sup>, Stefan Willich<sup>9</sup>, Robert Wolff<sup>5</sup>, Christoph Stallmann<sup>1</sup>

<sup>1</sup> Institute of Social Medicine and Health Systems Research, Otto-von-Guericke University Magdeburg, Faculty of Medicine, Magdeburg, Germany, [ilona.hrudey@med.ovgu.de](mailto:ilona.hrudey@med.ovgu.de), [enno.swart@med.ovgu.de](mailto:enno.swart@med.ovgu.de), [christoph.stallmann@med.ovgu.de](mailto:christoph.stallmann@med.ovgu.de)

<sup>2</sup> Institute of Epidemiology and Preventive Medicine, University of Regensburg, Faculty of Medicine, Regensburg, Germany, [hansjoerg.baurecht@ukr.de](mailto:hansjoerg.baurecht@ukr.de), [michael.leitzmann@klinik.uni-regensburg.de](mailto:michael.leitzmann@klinik.uni-regensburg.de)

<sup>3</sup> Heidelberg Institute of Global Health, University Hospital Heidelberg, Heidelberg, Germany, [heiko.becher@uni-heidelberg.de](mailto:heiko.becher@uni-heidelberg.de)

<sup>4</sup> Max Rubner-Institut (MRI), Bundesforschungsinstitut für Ernährung und Lebensmittel, Institut für Kinderernährung, Karlsruhe, Germany, [antje.damms-machado@mri.bund.de](mailto:antje.damms-machado@mri.bund.de)

<sup>5</sup> Institute for Community Medicine, University Medicine Greifswald, Greifswald, Germany, [wolfgang.hoffmann@uni-greifswald.de](mailto:wolfgang.hoffmann@uni-greifswald.de), [claudia.meinke-franze@uni-greifswald.de](mailto:claudia.meinke-franze@uni-greifswald.de), [sabine.schipf@uni-greifswald.de](mailto:sabine.schipf@uni-greifswald.de), [robert.wolff@uni-greifswald.de](mailto:robert.wolff@uni-greifswald.de)

<sup>6</sup> Institute of Medical Informatics, Biometry and Epidemiology, University Hospital of Essen, Essen, Germany, [k-h.joeckel@uk-essen.de](mailto:k-h.joeckel@uk-essen.de), [boerge.schmidt@uk-essen.de](mailto:boerge.schmidt@uk-essen.de)

<sup>7</sup> Institute for Outcomes Research, Center for Medical Data Science, Medical University of Vienna, Vienna, Austria, [nadja.kartschmit@meduniwien.ac.at](mailto:nadja.kartschmit@meduniwien.ac.at)

<sup>8</sup> German Cancer Research Centre - DKFZ, Heidelberg, Germany, [v.katzke@dkfz-heidelberg.de](mailto:v.katzke@dkfz-heidelberg.de), [t.niedermaier@dkfz-heidelberg.de](mailto:t.niedermaier@dkfz-heidelberg.de)

<sup>9</sup> Institute for Social Medicine, Epidemiology und Health Economics, Charité - Universitätsmedizin Berlin, Berlin, Germany, [thomas.keil@charite.de](mailto:thomas.keil@charite.de), [stefan.willich@charite.de](mailto:stefan.willich@charite.de)

<sup>10</sup> Institute for Clinical Epidemiology and Biometry, University of Wuerzburg, Wuerzburg, Germany

<sup>11</sup> State Institute of Health, Bavarian Health and Food Safety Authority, Bad Kissingen, Germany

<sup>12</sup> Leibniz Institute for Prevention Research and Epidemiology - BIPS, Bremen, Germany, [kollhorst@leibniz-bips.de](mailto:kollhorst@leibniz-bips.de), [pigeot@leibniz-bips.de](mailto:pigeot@leibniz-bips.de)

<sup>13</sup> Institute for Prevention and Cancer Epidemiology, University of Freiburg, Faculty of Medicine and Medical Centre, Freiburg, Germany, [tumorepidemiologie@uniklinik-freiburg.de](mailto:tumorepidemiologie@uniklinik-freiburg.de)

<sup>14</sup> Institute of Medical Epidemiology, Biometrics and Informatics, Martin-Luther-University Halle-Wittenberg, Halle, Germany, [rafael.mikolajczyk@uk-halle.de](mailto:rafael.mikolajczyk@uk-halle.de)

<sup>15</sup> University of Bremen, Faculty of Mathematics and Computer Science, Bremen, Germany

<sup>16</sup> Cancer Registry Saarland, Ministry of Labour, Social Affairs, Women and Health, Saarland, Germany, [b.walter@soziales.saarland.de](mailto:b.walter@soziales.saarland.de)

NOTE: This preprint reports new research that has not been certified by peer review and should not be used to guide clinical practice.

Correspondence to: Christoph Stallmann, Otto-von-Guericke University Magdeburg, Institute of Social Medicine and Health Systems Research, Faculty of Medicine, Leipziger Str. 44, 39120 Magdeburg, Germany, christoph.stallmann@med.ovgu.de

## 1 **Abstract**

### 2 **Background**

3 In Germany, all citizens must purchase health insurance, in either statutory (SHI) or private  
4 health insurance (PHI). Because of the division into SHI and PHI, person insurance's status is  
5 an important variable for studies in the context of public health research. In the German Na-  
6 tional Cohort (NAKO), the variable on self-reported health insurance status of the participants  
7 has a high proportion of missing values (55.4%). The aim of our study was to develop and  
8 internally validate models to predict the health insurance status of NAKO baseline survey par-  
9 ticipants in order to replace missing values. In this respect, our research interest was focused  
10 on the question to which extent socio-demographic characteristics are suitable for predicting  
11 health insurance status.

### 12 **Methods**

13 We developed two prediction models including 53,796 participants to estimate the probability  
14 that a participant is either member of a SHI (model 1) or PHI (model 2). We identified eight  
15 predictors by literature research: occupation, income, education, sex, age, employment status,  
16 residential area, and marital status. The predictive performance was determined in the internal  
17 validation considering discrimination and calibration. Discrimination was assessed based on  
18 the Area Under the Curve (AUC) and the Receiver Operating Characteristic (ROC) curve and  
19 calibration was assessed based on the calibration slope and calibration plot.

### 20 **Results**

21 In model 1, the AUC was 0.91 (95% CI: 0.91-0.92) and the calibration slope was 0.97 (95%  
22 CI: 0.97-0.97). Model 2 had an AUC of 0.91 (95% CI: 0.90-0.91) and a calibration slope of 0.97  
23 (95% CI: 0.97-0.97). Based on the calculated performance parameters both models turned out

24 to show an almost ideal discrimination and calibration. Employment status and household in-  
25 come and to a lesser extent educational level, age, sex, marital status, and residential area  
26 are suitable for predicting health insurance status.

## 27 **Conclusions**

28 Socio-demographic characteristics especially employment status and household income as-  
29 sessed at NAKO's baseline were suitable for predicting the statutory and private health insur-  
30 ance status. However, before applying the prediction models in other studies, an external val-  
31 idation in population-based studies is recommended.

32 **Keywords:** prediction models, missing values, health insurance status, cohort study, primary  
33 data

34

## 35 **Introduction**

36 With 205,264 participants, the German National Cohort (NAKO; German: *NAKO Gesund-*  
37 *heitsstudie*) is the largest German population-based prospective cohort study to date. The pri-  
38 mary goal of the NAKO is to investigate the aetiology, risk, and protective factors of widespread  
39 chronic and infectious diseases such as cancer, diabetes mellitus, neurodegenerative and psy-  
40 chiatric diseases as well as diseases of the cardiovascular and respiratory systems. The find-  
41 ings will be used to derive new strategies for the prevention, early detection, and treatment of  
42 these diseases. In addition to the elicitation and collection of comprehensive health data, a  
43 sustainable infrastructure for public health research will be established in Germany by this  
44 huge cohort [1–5]. As part of the passive follow-up, the collected primary data are enriched  
45 with claims and registry data (e.g. health insurance, pension insurance, and cancer registry  
46 data), which include information on the exposure and disease status as well as on the utilisa-  
47 tion of medical services of the study participants [4, 6]. For the first time in Germany, record  
48 linkage of data from statutory (SHI) and private health insurances (PHI) with primary data of  
49 study participants will be realized [2, 6, 7].

50 In Germany, health insurance has been mandatory since 2009, i.e. all citizens must insure  
51 themselves either in the SHI or in the PHI. Cover through SHI is mandatory for employees and  
52 other groups (e.g. pensioners) with a gross income below the opt-out threshold (64,350€ per  
53 year in 2021). Persons with an income above the threshold can purchase substitutive PHI.  
54 Self-employed can choose between voluntary membership in the SHI and substitutive cover-  
55 age through PHI, regardless of income. For certain professional groups (e.g. civil servants),  
56 membership in PHI is mandatory. In Germany, about 85% of the population are covered by  
57 SHI and 11% are covered by substitutive PHI. Sector-specific governmental schemes provide  
58 coverage for certain population groups such as police officers, soldiers and refugees. The co-  
59 existence of SHI and PHI leads to inequalities due to differences in financing, access and  
60 provision of health care [8, 9]. More details on the German health insurance system can be  
61 found in [8, 9].

62 Various studies have shown that health status, medical care and the distribution of socio-de-  
63 mographic characteristics differ between people with SHI and PHI. For example, privately in-  
64 sured people earn a higher average income and are on average healthier than statutory in-  
65 sured [7, 10–17]. Therefore, person insurance’s status is an important variable for studies in  
66 the context of public health research in Germany. However, existing studies that investigated  
67 differences between statutorily and privately insured persons are mainly cross-sectional and  
68 were subject to limitations such as small sample sizes in which subgroup analyses are difficult  
69 [18]. Also, claims data analyses have mostly used data from SHI [7]. Thus, approximately 11%  
70 privately insured persons of the German population [9] were ignored in most analyses [7]. In  
71 this respect, the NAKO offers a unique opportunity since health-related factors of statutorily  
72 and privately insured persons can be longitudinally analysed in a huge study population in-  
73 cluding a large number of collected variables [18–20].

## 74 **Background**

75 The acquisition and scientific use of claims and registry data and its individual linkage with  
76 primary data in the NAKO requires informed consent, which is retro- and prospectively valid

77 for 5 years and must then be renewed [21]. Health insurance number, name of the insurance  
78 company and the information 'privately insured' (yes/no) were recorded during the consent  
79 process [22, 23] from those participants who gave their informed consent (n=188,974; 92%;  
80 **Fig. 1**).

81 <<Fig. 1 insert here>>

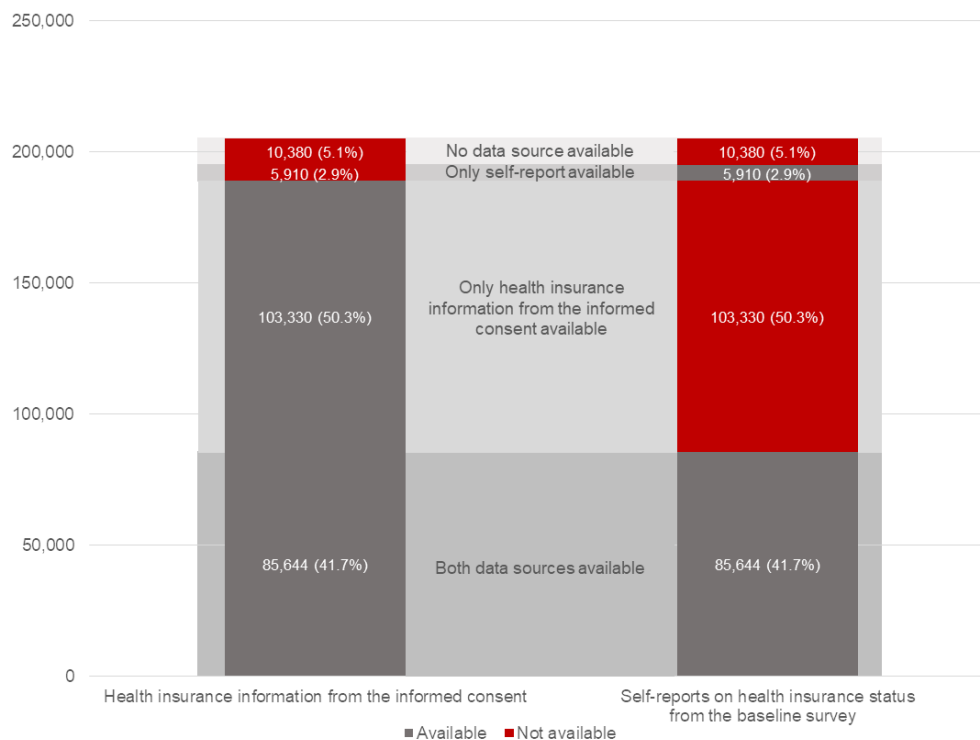

82

83 **Fig. 1** Completeness of data on health insurance status in the NAKO baseline assessment

84 To enable the comparison of health-relevant aspects between participants with SHI or PHI  
85 without actually having access to their claims data, the health insurance status has been ad-  
86 ditionally recorded since 2017 in the baseline survey on participants' self-report. **Table 1** illus-  
87 trates the recording of health insurance information in the NAKO. The baseline survey began  
88 in 2014. The question on health insurance status was subsequently included in 2017 as part  
89 of the revision of the touchscreen self-filler questionnaire. This resulted in the high number of  
90 missing values in the variable (n=113,710; 55.4%). For 10,380 participants (5.1%), no infor-  
91 mation on health insurance status is available in either data source (**Fig. 1**). In the NAKO's

92 follow-up (2018-2023), the health insurance status of all participants will be continuously rec-  
 93 orded in a computer-assisted personal interview (CAPI).

94 **Table 1** Recording of health insurance information in the NAKO baseline assessment (information on consent pro-  
 95 cess from [23])

| <b>Consent process</b>                                                           |                                                                                                                                                    |
|----------------------------------------------------------------------------------|----------------------------------------------------------------------------------------------------------------------------------------------------|
| Question                                                                         | Answer option                                                                                                                                      |
| Scanning of the health insurance card and determining the following information: |                                                                                                                                                    |
| 'Privately insured'                                                              | Yes<br>No                                                                                                                                          |
| Health insurance number                                                          | Free text                                                                                                                                          |
| Health insurance number not brought along                                        | Field to tick off                                                                                                                                  |
| Number of the health insurance company                                           | Free text                                                                                                                                          |
| Name of the health insurance company                                             | Drop-down list                                                                                                                                     |
| Remarks on health insurance                                                      | Free text                                                                                                                                          |
| <b>Touchscreen self-filler questionnaire</b>                                     |                                                                                                                                                    |
| Question                                                                         | Answer option                                                                                                                                      |
| Are you a member of a health insurance?*                                         | Yes, I am a member of a SHI<br>Yes, I am a member of a PHI<br>Yes, I am otherwise insured<br>No, I am not insured<br>I don't know<br>Not specified |

96 \* Translation by authors

97 For the analysis of health-relevant differences between statutorily and privately health insured  
 98 persons using the data set of the NAKO baseline survey, valid and non-missing information on  
 99 the health insurance status is required. Incorrect information may result from the participants'  
 100 limited institutional knowledge of the German health insurance system. For example, it is con-  
 101 ceivable that respondents claim to be a member of PHI although they have a supplementary  
 102 PHI or are insured through sector-specific governmental schemes such as the *Freie*  
 103 *Heilfürsorge*, which e.g. covers soldiers and police officers [24]. Using the incorrect self-report  
 104 of health insurance status in a statistical analysis may introduce information bias by measure-  
 105 ment error and by this may lead to biased estimators and, therefore, invalid study results [25,  
 106 26].

107 Self-reported health insurance status was already validated as part of the quality assurance of  
108 the baseline survey. For this purpose, the self-reported health insurance status information  
109 from the touchscreen self-filler questionnaire was linked to the health insurance information  
110 'privately insured' and 'name of the health insurance company' (see **Table 1**) from the informed  
111 consent. Information from both data sources was compared and, if necessary, a correction  
112 was made in the self-reported variable. Validation was only possible for participants who pro-  
113 vided information in both data sources (n=85,644; 41.7%). In implausible cases, the name of  
114 the health insurance company was used for validation. This procedure was used to derive a  
115 corrected variable for the self-reported health insurance status, which still has a high proportion  
116 of missing values due to the above-mentioned reasons.

117 The aim of our study was to develop and internally validate models to predict the health insur-  
118 ance status of participants in the NAKO baseline survey in order to replace missing values. In  
119 this respect, our research interest was focused on the question to which extent socio-demo-  
120 graphic characteristics are suitable for predicting the health insurance status of participants in  
121 the NAKO for whom neither self-reports on health insurance status nor health insurance infor-  
122 mation from informed consent are available.

## 123 **Methods**

### 124 **Database**

125 During the baseline survey, 205,264 participants aged between 20 and 69 years were recruited  
126 between March 2014 and September 2019 in 18 study centres distributed throughout Ger-  
127 many. Sex- and age-stratified random samples (women and men with a share of 50% each;  
128 10% each of 20-29 and 20-39 year-olds, 26.6% each of 40-49, 50-59 and 60-69 year-olds)  
129 were drawn from the general population via the regional population registers [1–4]. Further  
130 inclusion criteria were sufficient German language skills and the ability to give informed con-  
131 sent to participate in the study. CAPI's, touchscreen self-filler questionnaires and physical ex-

132 ainations were conducted. Certified and trained personnel as well as a common study pro-  
133 tocol ensured standardised procedures applied by all study centres. The preliminary mean  
134 response rate was approximately 18% [2]. Further details on the study design and the study  
135 population can be found in [1–4, 18].

136 The present analysis was based on the data set generated from the NAKO baseline survey  
137 described above, where it should be noted that, with the exception of the variable on self-  
138 reported health insurance status, this is a non-quality assured data set. Nevertheless, initial  
139 plausibility checks indicate that the data quality is high. The data set also includes persons  
140 older than 69 years (n=4,401), since in some cases several years passed between sampling  
141 of participants and conduct of the baseline survey [27].

## 142 **Outcome variables**

143 We developed two prediction models to estimate the probability that a participant is either  
144 member of a SHI (model 1) or PHI (model 2). Based on the operationalisation of the self-  
145 reported health insurance status (**Table 1**) we defined the outcome variable in model 1 as  
146 follows: 1='statutorily insured', 0='not statutorily insured'. The category 'not statutorily insured'  
147 includes participants who are privately, otherwise, or not health insured. In model 2, we used  
148 the following coding: 1='privately insured', 0='not privately insured'. Participants who indicated  
149 having a statutory, other, or no health insurance were assigned to the category 'not privately  
150 insured'.

## 151 **Predictor variables**

152 We selected the predictors based on literature research. Due to the regulations for having  
153 access to PHI described above, there is a selection in PHI towards people with a higher aver-  
154 age income and thus a higher socio-economic status by design. Various empirical studies have  
155 examined the distribution of socio-demographic differences between persons with SHI and  
156 PHI. These studies have shown that privately insured people have a higher socio-economic



157 status in terms of income, education level and occupation compared to people with SHI. Be-  
158 sides, a comparatively higher proportion of women and elderly people are covered by SHI. The  
159 share of PHI-insured persons is higher in West Germany than in East Germany. In addition,  
160 there are differences in the family structures between the two groups of differently insured  
161 persons, since married persons are more likely to opt for SHI [7, 10–12, 15–17]. In summary,  
162 we identified eight potentially suitable predictors of health insurance status by the literature  
163 research: occupation, income, education, sex, age, employment status, residential area, and  
164 marital status. Other potentially relevant predictors of health insurance status, such as health  
165 status or migration background, were not considered because they were not included in the  
166 available data set.

167 The elicitation of socio-demographic characteristics in the NAKO was mainly based on the  
168 Federal Statistical Office's *demographic standards* of 2010 [28]. Further information on the  
169 instruments used to measure socio-demographic characteristics in the NAKO and on their dis-  
170 tribution at the half-time of the baseline assessment can be found in [18]. We included age as  
171 a continuous variable in the prediction models to avoid loss of information through classifica-  
172 tion. For descriptive purposes, we additionally classified age into 10-year groups analogously  
173 to the sampling strategy [2]. All other predictors were per se categorical variables. We divided  
174 the household income into five quantiles according to the recommendation of *demographic*  
175 *standards* [28]. The variable study centre served as a proxy for the residential area. Employ-  
176 ment status was classified according to the International Labour Organisation (ILO) *Labour*  
177 *Force Concept* [29]. We combined the highest educational and vocational qualifications of the  
178 respondents based on the *Comparative Analysis of Social Mobility in Industrial Nations (CAS-*  
179 *MIN)* educational classification [28, 30, 31]. Additionally, we summarised the categories for the  
180 variables employment status and marital status further. The exact classifications of the respec-  
181 tive variables are shown in **Table 2** to **Table 4**. Reporting of this study is based on the *Trans-*  
182 *parent Reporting of a multivariable prediction model for Individual Prognosis Or Diagnosis*  
183 *(TRIPOD)*-Guidelines [32, 33].

## 184 **Statistical analysis**

185 We calculated absolute and relative frequencies for categorical variables and mean values and  
186 standard deviations for continuous variables to describe the study population. The analysis  
187 was conducted according to the approach proposed by Moons et al.: identification of predic-  
188 tors, regression analysis, assessment of predictive performance, and validation [34]. The pre-  
189 dictive analysis consisted of two main steps: first, the development of the prediction models in  
190 the training data set, and, second, the internal validation in the test data set. We used a split-  
191 sample approach to avoid overfitting. The training data set comprised 70% and the test data  
192 set 30% of the data. Participants with missing data (4.4%) were deleted in both data sets  
193 (complete-case-analysis).

194 The first step of the statistical analysis was the development of the two prediction models.  
195 Using the full model approach, the predictor variables were included in prediction models. As  
196 already mentioned, we included all predictors by means of a priori knowledge. This procedure  
197 avoids overfitting, and a predictor selection bias [34].

198 The second step was to internally validate the prediction models. We calculated the predicted  
199 values by the two developed models in the test data set. The predictive performance was  
200 assessed considering discrimination and calibration. Discrimination describes the ability of a  
201 prediction model to distinguish between persons with and without outcome and was assessed  
202 using the Area Under the ROC Curve (AUC). The AUC takes values between 0.5 and 1 were  
203 an AUC of 0.5 indicates that the discriminative ability is not better than chance. An AUC of 1  
204 corresponds to an ideal discrimination. In this study, the AUC represents the ability to distin-  
205 guish between statutorily and not statutorily health insured persons and privately and not pri-  
206 vately health insured persons. The Receiver Operating Characteristic (ROC) curve was used  
207 to visualise the discriminative ability. This is a graph showing the true positive rate (sensitivity)  
208 versus the false-positive rate (1 - specificity).

209 Calibration means the agreement between the observed and predicted values. We assessed  
210 calibration with the calibration slope and graphically using the calibration plot [35]. In the cali-  
211 bration plot, we plotted the predicted probabilities against the observed values and added a  
212 line according to the Loess algorithm [36]. A diagonal 45° line was used for orientation and  
213 corresponds to an ideal calibration. We estimated the calibration slope with a logistic regres-  
214 sion model by regressing the outcome on the logit of the predicted probability as the only pre-  
215 dictor variable. A calibration slope of 1 indicates ideal calibration [35]. We calculated 95% con-  
216 fidence intervals for the performance parameters according to the TRIPOD-Guidelines [32].  
217 The statistical analysis was done using IBM SPSS 26 ©.

## 218 **Results**

### 219 **Selection of the study population**

220 We excluded nine subjects due to implausible values in the age variable. A further 119,619  
221 subjects were excluded, where only the health insurance information from the informed con-  
222 sent or only from self-reports was available, or no information on health insurance status was  
223 available in either data source. After excluding 8,943 subjects due to missing values in the  
224 outcome and predictor variables, the study population consisted of 76,693 persons. These  
225 were randomly assigned to a training data set (n=53,796) and a test data set (n=22,897) (**Fig.**  
226 **2**).

227 <<Fig. 2 insert here>>

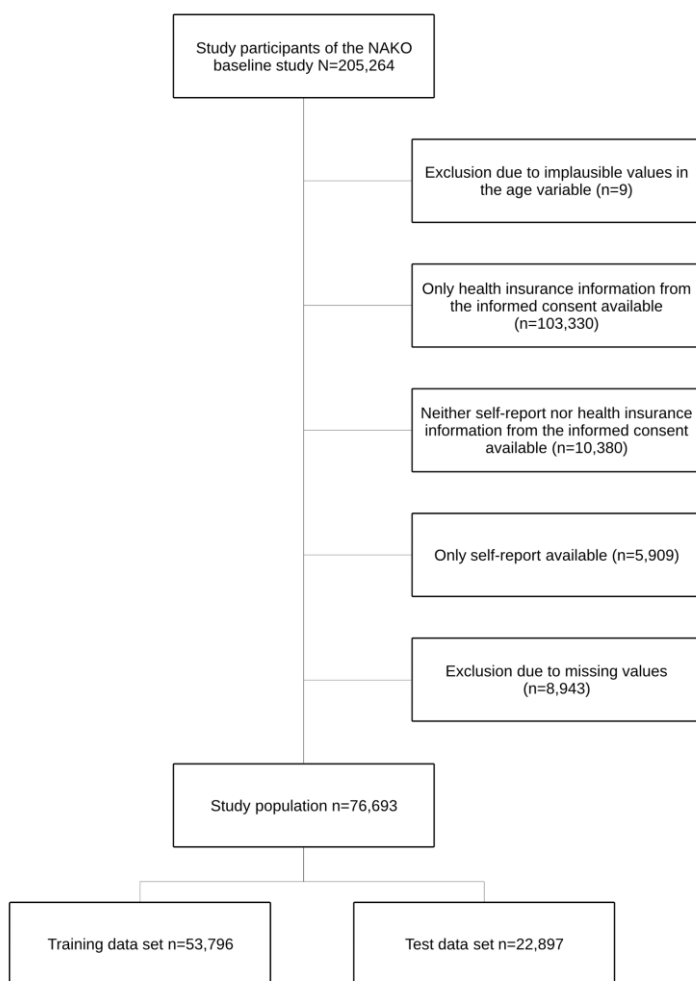

228

229 **Fig. 2** Selection of study population recruited 2014 - 2019 for the NAKO with 18 study centres

230 **Description of the study population according to socio-demographic character-**  
231 **istics**

232 **Table 2** shows the socio-demographic characteristics of the total study population as well as  
233 the participants in the training and test data set (mean age 47 years). The proportion of men  
234 was higher than that of women (54% vs. 46%). In the training and in the test data set, 83.3%  
235 and 83.2% of the participants were statutorily health insured, and 16.0% were privately health  
236 insured. The proportions of otherwise insured and uninsured persons were less than 1% each.

237 << Table 2 insert here >>

## 238 Prediction model for the probability of membership in a SHI

239 The prediction model for the probability of being insured by SHI and the performance of the  
240 model are shown in **Table 3**. We based the model on 53,796 participants, 44,802 of whom are  
241 insured in the SHI system. The most important predictors were employment status and house-  
242 hold income. The residential area was left in the model despite a non-significant regression  
243 coefficient since other studies have shown regional differences between the two groups of  
244 differently insured persons.

245 << Table 3 insert here >>

246 The AUC of 0.91 (95%-CI: 0.91-0.92) indicated almost ideal discrimination between persons  
247 with SHI and non-SHI (**Table 3**). The ROC curve also showed the model's good discriminative  
248 ability (**Fig. 3**). The calibration plot, which represents the agreement between observed and  
249 predicted values for membership in a SHI, showed an almost ideal calibration (**Fig. 4**). The  
250 calibration slope of 0.97 (95% CI: 0.97-0.97) did not show any overfitting problems (**Table 3**).  
251 Therefore, a correction of the regression coefficients was not necessary.

252 <<Fig. 3 insert here>>

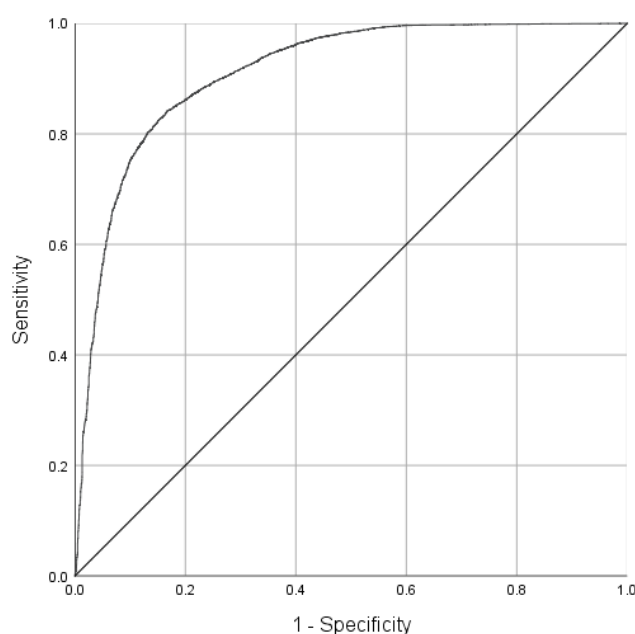

253

254 **Fig. 3** ROC curve for the prediction model for the probability of membership in a SHI

255 <<Fig. 4 insert here>>

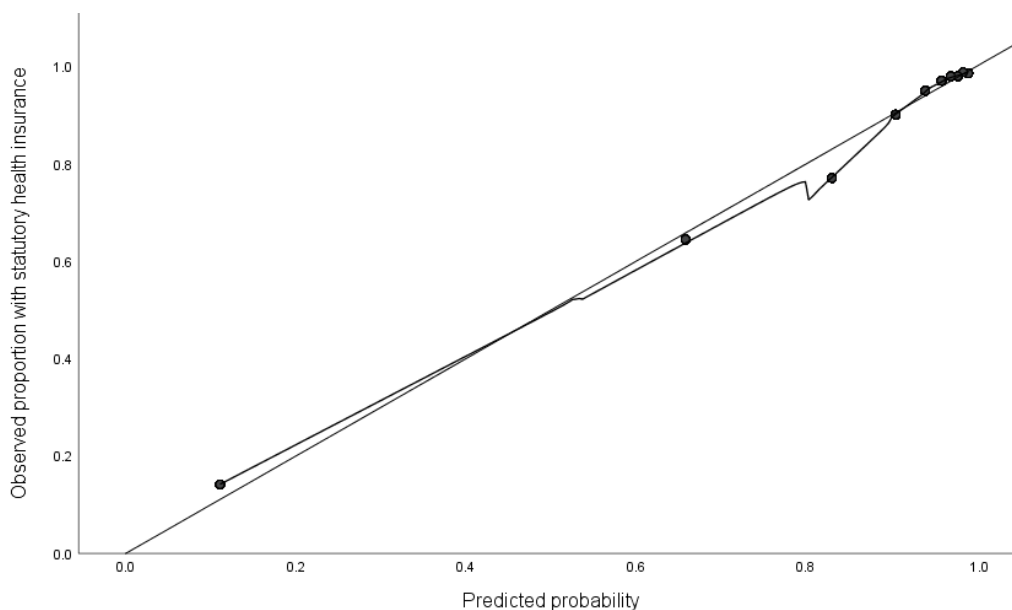

256

257 **Fig. 4** Calibration plot for the prediction model for the probability of membership in a SHI

#### 258 **Prediction model for the probability of membership in a PHI**

259 The prediction model for the probability of being insured by PHI and the performance of the  
260 model are shown in **Table 4**. We based the model on 53,796 participants, 8,588 of whom are  
261 insured in the PHI system. As in the first model, employment status and household income  
262 turned out to be important predictors (**Table 4**). According to the AUC of 0.91 (95% CI: 0.90-  
263 0.91), this model had a very high discriminative ability, which was also shown in the ROC curve  
264 (**Fig. 5**). The calibration slope of 0.97 (0.97-0.97) and the calibration plot showed close to ideal  
265 calibration (**Fig. 6 & Table 4**). The probabilities predicted by the model differed only slightly  
266 from the observed values.

267 << Table 4 insert here >>

268 <<Fig. 5 insert here>>

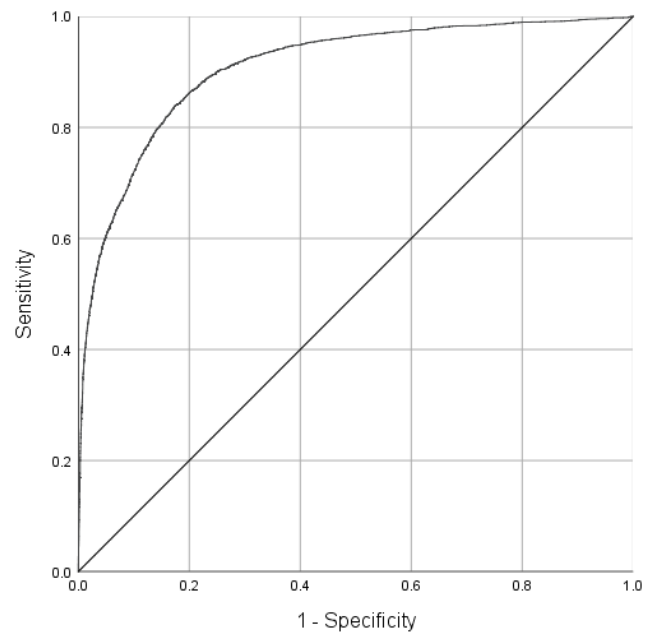

269

270 **Fig. 5** ROC curve for the prediction model for the probability of membership in a PHI

271 <<Fig. 6 insert here>>

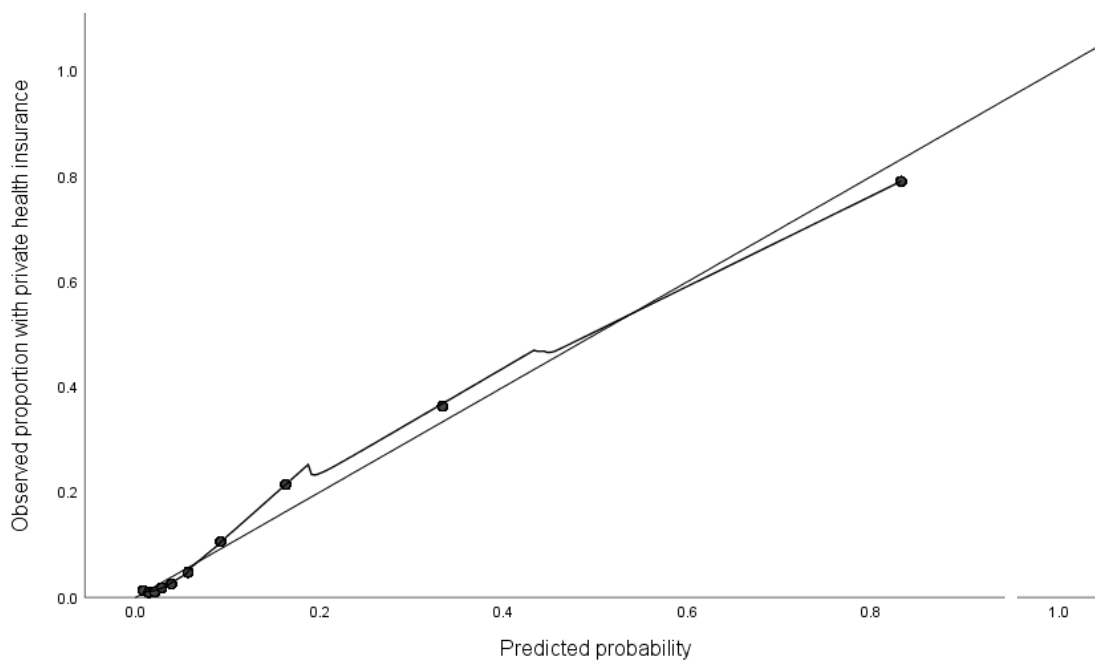

272

273 **Fig. 6** Calibration plot for the prediction model for the probability of membership in a PHI

274

## 275 **Discussion and Conclusions**

### 276 **Key findings**

277 The present study aimed at answering the question to which extent selected socio-demo-  
278 graphic characteristics are suitable for predicting the health insurance status of participants in  
279 the NAKO baseline survey for whom neither self-reports on health insurance status nor health  
280 insurance information from informed consent are available. For this purpose, we developed  
281 and internally validated two prediction models. We investigated the performance of the models  
282 with respect to their discrimination and calibration ability to assess whether the predicted val-  
283 ues can be used as reliable replacement of the missing values in the variable on self-reported  
284 health insurance status.

285 Information on the health insurance status is available from participants who have agreed to  
286 provide claims data via their health insurance. In addition, the self-reported health insurance  
287 status has been collected during the baseline survey since 2017. The variable on self-reported  
288 health insurance status has a high proportion of missing values due to the subsequent inclu-  
289 sion of the question in the touchscreen self-filler questionnaire during its revision. For 5.1% of  
290 the participants, neither of the two data sources contains information on health insurance sta-  
291 tus.

292 The literature review identified occupation, income, education, sex, age, employment status,  
293 residential area, and marital status as potentially suitable predictors of health insurance status  
294 [7, 10–12, 15–17]. Based on this information, we developed and internally validated two pre-  
295 diction models. Model 1 estimated the probability of a person being insured by SHI and model  
296 2 estimated the probability of a person being insured by PHI. The internal validation showed  
297 extraordinarily good performance of the developed prediction models. Based on performance  
298 parameters and via graphical representations both models turned out to show an almost ideal  
299 discrimination and calibration. The models distinguished very well between persons with and



300 without the respective outcome (SHI and PHI). The calibration plots showed that the probabil-  
301 ities predicted by the models differ only slightly from the observed values. In model 1, the  
302 observed values were slightly lower than the predicted probabilities. Model 2 showed the op-  
303 posite picture. External validation is necessary for further assessment of their calibration, since  
304 here, for example, the calibration-in-the-large can also be considered additionally [35].

305 The results of the internal validation clearly show that the socio-demographic characteristics  
306 included in the models prove to be suitable predictors for the health insurance status of the  
307 participants in the NAKO baseline survey. In particular, employment status and household in-  
308 come are important to predict the health insurance status of NAKO participants. This finding is  
309 very plausible considering the regulations for having access to PHI. PHI only insures persons  
310 with a gross income above the opt-out threshold or specific professional groups such as civil  
311 servants or self-employed [8]. It should be noted that in the present study, the monthly net  
312 household income was included in the analyses, as the NAKO does not collect respondent  
313 income.

### 314 **Strengths and limitations**

315 The strengths of our analysis included the large study population drawn from random samples  
316 of regional population registers and the high number of outcomes, which significantly influence  
317 the robustness of statistical results in predictive analyses. In addition, large samples reduce  
318 the probability of an overly optimistic estimate of the predictive performance [32, 35]. A further  
319 strength was the standardised collection of the predictor variables. On the one hand, this en-  
320 sured high data quality with regard to the socio-demographic characteristics in the NAKO [18].  
321 On the other hand, the orientation towards the *demographic standards* in the collection of the  
322 characteristics enables a certain reproducibility. The models developed can be applied to data  
323 sets or studies in which the socio-demography of the participants is acquired in the same way.  
324 Using the equations given in **Table 3** and **Table 4**, the predicted probability of membership in  
325 SHI or PHI can be calculated. Besides, the prediction models were developed and internally  
326 validated considering current recommendations and guidelines.

327 The present analysis also has some limitations. First, the lack of external validation of the  
328 prediction models means that the results may not be generalised to other research settings.  
329 Second, other potentially relevant predictors of health insurance status, such as health status  
330 or migration background, were not considered because they were not included in the available  
331 data set. Another limitation was the dichotomisation of the outcome variables. The develop-  
332 ment of a model for the prediction of all possible health insurance statuses could have been  
333 realized using multinomial logistic regression. This would be of interest for an optimisation or  
334 completion of the variable on the self-reported health insurance status. In the present study,  
335 only the outcomes SHI and PHI were considered, since the literature on predictive modelling  
336 mainly refers to binary endpoints. Additionally, in the context of e.g. health services research,  
337 the focus lies on the distinction between those with SHI and PHI.

### 338 **Implications and recommendations for future research**

339 Our findings show that socio-demographic characteristics are suitable predictors for the health  
340 insurance status of the participants in the NAKO baseline survey. The predicted values can be  
341 used as reliable replacement of the missing values in the variable on self-reported health in-  
342 surance status. However, before the models are used, e.g. for the preparation and processing  
343 of data from other studies, an external validation in population-based studies is recommended.  
344 Future studies could investigate to which extent replacing the missing values in the variable  
345 on the self-reported health insurance status with the developed prediction models differs from  
346 multiple imputation and which procedure yields better results.

347

## **Tables larger than one A4 page**

**Table 2** Description of the study population (German National Cohort) according to socio-demographic characteristics

| <b>Characteristics<sup>a</sup></b> | <b>Total study popula-<br/>tion<br/>N=76,693</b> | <b>Training data set<br/>N=53,796</b> | <b>Test data set<br/>N=22,897</b> |
|------------------------------------|--------------------------------------------------|---------------------------------------|-----------------------------------|
|------------------------------------|--------------------------------------------------|---------------------------------------|-----------------------------------|

---

|                                                       |               |               |               |
|-------------------------------------------------------|---------------|---------------|---------------|
| <b>Sex, n (%)</b>                                     |               |               |               |
| Women                                                 | 35,219 (45.9) | 24,613 (45.8) | 10,606 (46.3) |
| Men                                                   | 41,474 (54.1) | 29,183 (54.2) | 12,291 (53.7) |
| <b>Age at examination date, mean (SD)<sup>b</sup></b> |               |               |               |
|                                                       | 47.4 (12.2)   | 47.5 (12.2)   | 47.4 (12.2)   |
| <b>Age groups, n (%)</b>                              |               |               |               |
| 20-29 years                                           | 8,651 (11.3)  | 6,056 (11.3)  | 2,595 (11.3)  |
| 30-39 years                                           | 9,783 (12.8)  | 6,870 (12.8)  | 2,913 (12.7)  |
| 40-49 years                                           | 24,669 (32.2) | 17,251 (32.1) | 7,418 (32.4)  |
| 50-59 years                                           | 19,197 (25.0) | 13,401 (24.9) | 5,796 (25.3)  |
| 60-69 years                                           | 13,611 (17.7) | 9,668 (18.0)  | 3,943 (17.2)  |
| 70-75 years                                           | 782 (1.0)     | 550 (1.0)     | 232 (1.0)     |
| <b>Education (CASMIN), n (%)</b>                      |               |               |               |
| Low                                                   | 8,686 (11.3)  | 6,091 (11.3)  | 2,595 (11.3)  |
| Middle                                                | 36,969 (48.2) | 26,030 (48.4) | 10,939 (47.8) |
| High                                                  | 31,038 (40.5) | 21,675 (40.3) | 9,363 (40.9)  |
| <b>Employment status, n (%)</b>                       |               |               |               |
| Employees                                             | 61,808 (80.6) | 43,299 (80.5) | 18,509 (80.8) |
| Self-employed                                         | 9,014 (11.8)  | 6,383 (11.9)  | 2,631 (11.5)  |
| Civil servants, judges, professional soldiers         | 5,760 (7.5)   | 4,042 (7.5)   | 1,718 (7.5)   |
| Contributing family workers                           | 111 (0.1)     | 72 (0.1)      | 39 (0.2)      |
| <b>Employment status (ILO), n (%)</b>                 |               |               |               |
| Employed                                              | 64,333 (83.9) | 45,100 (83.8) | 19,233 (84.0) |
| Unemployed                                            | 1,882 (2.5)   | 1,361 (2.5)   | 521 (2.3)     |
| Not in labour force                                   | 10,478 (13.7) | 7,335 (13.6)  | 3,143 (13.7)  |
| <b>Average monthly net household income, n (%)</b>    |               |               |               |
| 1€ to under 2,000€                                    | 13,122 (17.1) | 9,240 (17.2)  | 3,882 (17.0)  |
| 2,000€ to under 2,900€                                | 14,033 (18.3) | 9,793 (18.2)  | 4,240 (18.5)  |
| 2,900€ to under 4,000€                                | 18,614 (24.3) | 13,118 (24.4) | 5,496 (24.0)  |
| 4,000€ to under 5,000€                                | 12,956 (16.9) | 9,081 (16.9)  | 3,875 (16.9)  |
| 5,000€ and more                                       | 17,968 (23.4) | 12,564 (23.4) | 5,404 (23.6)  |
| <b>Residential area, n (%)</b>                        |               |               |               |
| New federal states (with Berlin)                      | 24,502 (31.9) | 17,185 (31.9) | 7,317 (32.0)  |
| Old federal states (without Berlin)                   | 52,191 (68.1) | 36,611 (68.1) | 15,580 (68.0) |
| <b>Marital status, n (%)</b>                          |               |               |               |
| Single                                                | 22,934 (29.9) | 15,995 (29.7) | 6,939 (30.3)  |
| Married                                               | 44,811 (58.4) | 31,546 (58.6) | 13,265 (57.9) |
| Divorced                                              | 7,483 (9.8)   | 5,240 (9.7)   | 2,243 (9.8)   |
| Widowed                                               | 1,465 (1.9)   | 1,015 (1.9)   | 450 (2.0)     |

| Health insurance status, n (%) |               |               |               |
|--------------------------------|---------------|---------------|---------------|
| Statutorily insured            | 63,859 (83.3) | 44,802 (83.3) | 19,057 (83.2) |
| Privately insured              | 12,252 (16.0) | 8,588 (16.0)  | 3,664 (16.0)  |
| Otherwise insured <sup>c</sup> | 462 (0.6)     | 321 (0.6)     | 141 (0.6)     |
| Not insured                    | 120 (0.2)     | 85 (0.2)      | 35 (0.2)      |

**SD** standard deviation, **CASMIN** Comparative Analysis of Social Mobility in Industrial Nations, **ILO** International Labour Organisation

<sup>a</sup> Differences in the sum of percentages may result from rounding.

<sup>b</sup> Age range: 20-75 years

<sup>c</sup> e.g. Freie Heilfürsorge

**Table 3** Prediction model for the probability of membership in a SHI

| Model estimates in the training data set <sup>a</sup> |                       |         |
|-------------------------------------------------------|-----------------------|---------|
| n                                                     | 53,796                |         |
| Number of SHI-insured persons                         | 44,802                |         |
| Variable                                              | Beta Coefficient (SE) | p-value |
| Sex                                                   |                       |         |
| Women                                                 | 0.874 (0.037)         | <0.001  |
| Men                                                   | Ref.                  | Ref.    |
| Age (per 1 year increase)                             | -0.031 (0.002)        | <0.001  |
| Education (CASMIN)                                    |                       |         |
| Low                                                   | 0.320 (0.070)         | <0.001  |
| Middle                                                | Ref.                  | Ref.    |
| High                                                  | -0.486 (0.036)        | <0.001  |
| Employment status                                     |                       |         |
| Employees                                             | Ref.                  | Ref.    |
| Self-employed                                         | -1.953 (0.036)        | <0.001  |
| Civil servants, judges, professional soldiers         | -5.655 (0.078)        | <0.001  |
| Contributing family workers                           | -1.370 (0.356)        | <0.001  |
| Employment Status (ILO)                               |                       |         |
| Employed                                              | Ref.                  | Ref.    |
| Unemployed                                            | 0.364 (0.161)         | 0.024   |
| Not in labour force                                   | -0.191 (0.059)        | 0.001   |
| Average monthly net household income                  |                       |         |
| 1€ to under 2,000€                                    | 1.038 (0.077)         | <0.001  |
| 2,000€ to under 2,900€                                | 0.513 (0.064)         | <0.001  |
| 2,900€ to under 4,000€                                | Ref.                  | Ref.    |
| 4,000€ to under 5,000€                                | -0.410 (0.055)        | <0.001  |
| 5,000€ and more                                       | -1.507 (0.047)        | <0.001  |
| Residential area                                      |                       |         |
| New federal states (with Berlin)                      | 0,039 (0,037)         | 0,293   |

|                                                                      |                  |        |
|----------------------------------------------------------------------|------------------|--------|
| Old federal states (without Berlin)                                  | Ref.             | Ref.   |
| <b>Marital status</b>                                                |                  |        |
| Single                                                               | -0,534 (0,045)   | <0,001 |
| Married                                                              | Ref.             | Ref.   |
| Divorced                                                             | -0,414 (0,061)   | <0,001 |
| Widowed                                                              | -0,474 (0,137)   | 0,001  |
| Intercept                                                            | 4,681 (0,106)    | <0,001 |
| <b>Assessment of the predictive performance in the test data set</b> |                  |        |
| n                                                                    | 22,897           |        |
| Number of SHI-insured persons                                        | 19,057           |        |
| AUC (95%-CI)                                                         | 0.91 (0.91-0.92) |        |
| Calibration slope (95%-CI)                                           | 0.97 (0.97-0.97) |        |

**SE** standard error, **CASMIN** Comparative Analysis of Social Mobility in Industrial Nations, **ILO** International Labour Organisation, **AUC** Area Under the Curve

<sup>a</sup> The predicted probability of a participant of being statutorily insured can be calculated as follows:  $P(SHI=1) = 1 / [1 + \exp(- (4.681 + 0.874 * \text{sex women} - 0.031 * \text{age} + 0.320 * \text{education low} - 0.486 * \text{education high} - 1.953 * \text{employment status self-employed} - 5.655 * \text{employment status civil servants, judges, professional soldiers} - 1.370 * \text{employment status contributing family workers} + 0.364 * \text{employment status unemployed} - 0.191 * \text{employment status not in labour force} + 1.038 * \text{household income 1€ to under 2,000€} + 0.513 * \text{household income 2,000€ up to under 2,900€} - 0.410 * \text{household income 4,000€ up to under 5,000€} - 1.507 * \text{household income 5,000€ and more} + 0.039 * \text{residential area new federal states} - 0.534 * \text{marital status single} - 0.414 * \text{marital status divorced} - 0.474 * \text{marital status widowed}))]$ . For categorical variables, a 1 is used if the predictor value is present and a 0 is used if it is absent.

**Table 4** Prediction model for the probability of membership in a PHI

|                                                             |                              |                |
|-------------------------------------------------------------|------------------------------|----------------|
| <b>Model estimates in the training data set<sup>a</sup></b> |                              |                |
| n                                                           | 53,796                       |                |
| Number of PHI-insured persons                               | 8,588                        |                |
| <b>Variable</b>                                             | <b>Beta Coefficient (SE)</b> | <b>p-value</b> |
| <b>Sex</b>                                                  |                              |                |
| Women                                                       | -0.725 (0.035)               | <0.001         |
| Men                                                         | Ref.                         | Ref.           |
| Age (per 1 year increase)                                   | 0.035 (0.002)                | <0.001         |
| <b>Education (CASMIN)</b>                                   |                              |                |
| Low                                                         | -0.273 (0.069)               | <0.001         |
| Middle                                                      | Ref.                         | Ref.           |
| High                                                        | 0.599 (0.035)                | <0.001         |
| <b>Employment status</b>                                    |                              |                |
| Employees                                                   | Ref.                         | Ref.           |
| Self-employed                                               | 1.974 (0.037)                | <0.001         |
| Civil servants, judges, professional soldiers               | 4.603 (0.057)                | <0.001         |
| Contributing family workers                                 | 1.193 (0.404)                | 0.003          |
| <b>Employment Status (ILO)</b>                              |                              |                |

|                                      |                |        |
|--------------------------------------|----------------|--------|
| Employed                             | Ref.           | Ref.   |
| Unemployed                           | -0.535 (0.172) | 0.002  |
| Not in labour force                  | 0.246 (0.056)  | <0.001 |
| Average monthly net household income |                |        |
| 1€ to under 2,000€                   | -1.053 (0.076) | <0.001 |
| 2,000€ to under 2,900€               | -0.500 (0.061) | <0.001 |
| 2,900€ to under 4,000€               | Ref.           | Ref.   |
| 4,000€ to under 5,000€               | 0.367 (0.054)  | <0.001 |
| 5,000€ and more                      | 1.471 (0.046)  | <0.001 |
| Residential area                     |                |        |
| New federal states (with Berlin)     | -0.112 (0.036) | 0.002  |
| Old federal states (without Berlin)  | Ref.           | Ref.   |
| Marital status                       |                |        |
| Single                               | 0.524 (0.044)  | <0.001 |
| Married                              | Ref.           | Ref.   |
| Divorced                             | 0.401 (0.059)  | <0.001 |
| Widowed                              | 0.434 (0.132)  | 0.001  |
| Intercept                            | -4.951 (0.104) | <0.001 |

#### Assessment of the predictive performance in the test data set

|                               |                  |
|-------------------------------|------------------|
| n                             | 22,897           |
| Number of PHI-insured persons | 3,664            |
| AUC (95%-CI)                  | 0.91 (0.90-0.91) |
| Calibration slope (95%-CI)    | 0.97 (0.97-0.97) |

**SE** standard error, **CASMIN** Comparative Analysis of Social Mobility in Industrial Nations, **ILO** International Labour Organisation, **AUC** Area Under the Curve

<sup>a</sup> The predicted probability of a participant of being privately insured can be calculated as follows:  $P(\text{PHI}=1) = 1/[1 + \exp(-(-4.951 - 0.725 \cdot \text{sex women} + 0.035 \cdot \text{age} - 0.273 \cdot \text{education low} + 0.599 \cdot \text{education high} + 1.974 \cdot \text{employment status self-employed} + 4.603 \cdot \text{employment status civil servants, judges, professional soldiers} + 1.193 \cdot \text{employment status contributing family workers} - 0.535 \cdot \text{employment status unemployed} + 0.246 \cdot \text{employment status not in labour force} - 1.053 \cdot \text{household income 1€ to under 2,000€} - 0.500 \cdot \text{household income 2,000€ up to under 2,900€} + 0.367 \cdot \text{household income 4,000€ up to under 5,000€} + 1.471 \cdot \text{household income 5,000€ and more} - 0.112 \cdot \text{residential area new federal states} + 0.524 \cdot \text{marital status single} + 0.401 \cdot \text{marital status divorced} + 0.434 \cdot \text{marital status widowed}))]$ . For categorical variables, a 1 is used if the predictor value is present and a 0 is used if it is absent.

## References

1. Wichmann H-E, Kaaks R, Hoffmann W, Jöckel K-H, Greiser KH, Linseisen J. Die Nationale Kohorte. [The German National Cohort]. Bundesgesundheitsblatt Gesundheitsforschung Gesundheitsschutz. 2012;55:781–7. doi:10.1007/s00103-012-1499-y.
2. Schipf S, Schöne G, Schmidt B, Günther K, Stübs G, Greiser KH, et al. Die Basiserhebung der NAKO Gesundheitsstudie: Teilnahme an den Untersuchungsmodulen, Qualitätssicherung und Nutzung von Sekundärdaten. [The baseline assessment of the German National Cohort (NAKO Gesundheitsstudie): participation in the examination mod-

- ules, quality assurance, and the use of secondary data]. *Bundesgesundheitsblatt Gesundheitsforschung Gesundheitschutz*. 2020;63:254–66. doi:10.1007/s00103-020-03093-z.
3. NAKO. The National Cohort: A prospective epidemiologic study resource for health and disease research in Germany. 2015. <https://nako.de/wp-content/uploads/2015/07/Wissenschaftliches-Konzept-der-NAKO2.pdf>. Accessed 17 Jul 2020.
  4. German National Cohort Consortium. The German National Cohort: aims, study design and organization. *Eur J Epidemiol*. 2014;29:371–82. doi:10.1007/s10654-014-9890-7.
  5. Ahrens W, Greiser KH, Linseisen J, Pischon T, Pigeot I. Erforschung von Erkrankungen in der NAKO Gesundheitsstudie. Die wichtigsten gesundheitlichen Endpunkte und ihre Erfassung. [The investigation of health outcomes in the German National Cohort: the most relevant endpoints and their assessment]. *Bundesgesundheitsblatt Gesundheitsforschung Gesundheitschutz*. 2020;63:376–84. doi:10.1007/s00103-020-03111-0.
  6. Stallmann C, Ahrens W, Kaaks R, Pigeot I, Swart E, Jacobs S. Individuelle Datenverknüpfung von Primärdaten mit Sekundär- und Registerdaten in Kohortenstudien: Potenziale und Verfahrensvorschläge. [Individual linkage of primary data with secondary and registry data within large cohort studies - capabilities and procedural proposals]. *Gesundheitswesen*. 2015;77:e37-42. doi:10.1055/s-0034-1396805.
  7. Gothe H, Köster A-D. Daten der Privaten Krankenversicherung (PKV). In: Swart E, Ihle P, Gothe H, Matusiewicz D, editors. *Routinedaten im Gesundheitswesen: Handbuch Sekundärdatenanalyse: Grundlagen, Methoden, und Perspektiven*. 2nd ed. Bern: Hans Huber; 2014. p. 245–253.
  8. Busse R, Blümel M. Germany: health system review. *Health Systems in Transition*. 2014;16(2):1–296.
  9. Busse R, Blümel M, Knieps F, Bärnighausen T. Statutory health insurance in Germany: a health system shaped by 135 years of solidarity, self-governance, and competition. *The Lancet*. 2017;390:882–97. doi:10.1016/S0140-6736(17)31280-1.
  10. Hoffmann F, Bachmann CJ. Unterschiede in den soziodemografischen Merkmalen, der Gesundheit und Inanspruchnahme bei Kindern und Jugendlichen nach ihrer Krankenkassenzugehörigkeit. [Differences in sociodemographic characteristics, health, and health service use of children and adolescents according to their health insurance funds]. *Bundesgesundheitsblatt Gesundheitsforschung Gesundheitschutz*. 2014;57:455–63. doi:10.1007/s00103-013-1916-x.
  11. Hoffmann F, Icks A. Unterschiede in der Versichertenstruktur von Krankenkassen und deren Auswirkungen für die Versorgungsforschung: Ergebnisse des Bertelsmann-Gesundheitsmonitors. [Structural differences between health insurance funds and their impact on health services research: results from the Bertelsmann Health-Care Monitor]. *Gesundheitswesen*. 2012;74:291–7. doi:10.1055/s-0031-1275711.
  12. Hoffmann F, Koller D. Verschiedene Regionen, verschiedene Versichertenpopulationen? Soziodemografische und gesundheitsbezogene Unterschiede zwischen Krankenkassen. [Different Regions, Differently Insured Populations? Socio-demographic and Health-related Differences Between Insurance Funds]. *Gesundheitswesen*. 2017;79:e1-e9. doi:10.1055/s-0035-1564074.
  13. Klein J, Knesebeck O von dem. Soziale Unterschiede in der ambulanten und stationären Versorgung : Ein Überblick über aktuelle Befunde aus Deutschland. [Social disparities in outpatient and inpatient care: An overview of current findings in Germany]. *Bundesgesundheitsblatt Gesundheitsforschung Gesundheitschutz*. 2016;59:238–44. doi:10.1007/s00103-015-2283-6.



14. Stauder J, Kossow T. Selektion oder bessere Leistungen – Warum sind Privatversicherte gesünder als gesetzlich Versicherte? [Selection or Better Service - Why are those with Private Health Insurance Healthier than those Covered by the Public Insurance System?]. *Gesundheitswesen*. 2017;79:181–7. doi:10.1055/s-0042-104583.
15. Verband der Privaten Krankenversicherung. Zahlenbericht 2018. Köln.
16. Haun D. Quo vadis, GKV und PKV? Entwicklung der Erwerbs- und Einkommensstrukturen von Versicherten im dualen System. In: Jacobs K, Schulze S, editors. *Die Krankenversicherung der Zukunft: Anforderungen an ein leistungsfähiges System*. Berlin: KomPart; 2013. p. 75–106.
17. Dräther H. Zur Bedeutung der Familienversicherung. In: Jacobs K, Klauber J, Leinert J, editors. *Fairer Wettbewerb oder Risikoselektion? Analysen zur gesetzlichen und privaten Krankenversicherung*. Bonn: Wissenschaftliches Institut der AOK; 2006. p. 49–66.
18. Dragano N, Reuter M, Greiser KH, Becher H, Zeeb H, Mikolajczyk R, et al. Soziodemografische und erwerbsbezogene Merkmale in der NAKO Gesundheitsstudie. [Socio-demographic and employment-related factors in the German National Cohort (GNC; NAKO Gesundheitsstudie)]. *Bundesgesundheitsblatt Gesundheitsforschung Gesundheitsschutz*. 2020;63:267–78. doi:10.1007/s00103-020-03098-8.
19. Ahrens W, Jöckel K-H. Der Nutzen großer Kohortenstudien für die Gesundheitsforschung am Beispiel der Nationalen Kohorte. [The benefit of large-scale cohort studies for health research: the example of the German National Cohort]. *Bundesgesundheitsblatt Gesundheitsforschung Gesundheitsschutz*. 2015;58:813–21. doi:10.1007/s00103-015-2182-x.
20. Lampert T, Richter M, Schneider S, Spallek J, Dragano N. Soziale Ungleichheit und Gesundheit : Stand und Perspektiven der sozialepidemiologischen Forschung in Deutschland. [Social inequality and health: Status and prospects of socio-epidemiological research in Germany]. *Bundesgesundheitsblatt Gesundheitsforschung Gesundheitsschutz*. 2016;59:153–65. doi:10.1007/s00103-015-2275-6.
21. NAKO. Einwilligungserklärung zur Teilnahme an der NAKO Gesundheitsstudie 2014-2019. 2018. [https://nako.de/wp-content/uploads/2015/04/ORG02-SD-A7\\_EWE\\_2.2.2\\_Blanko\\_Level-1-Schulung.pdf](https://nako.de/wp-content/uploads/2015/04/ORG02-SD-A7_EWE_2.2.2_Blanko_Level-1-Schulung.pdf). Accessed 17 Jul 2020.
22. NAKO. Teilnehmerinformation für die NAKO Gesundheitsstudie 2014-2019: Level 1 ohne OGTT. 2018. <https://nako.de/wp-content/uploads/2015/04/NAKO-TN-Broschüre-2018-Level-1-ohne-OGTT.pdf>. Accessed 17 Jul 2020.
23. Kalinowski S, Klüppelholz B, Schipf S, Schmidt B, Stübs G. Beschreibung des technischen Ablaufs des Einwilligungsprozesses: Anlage zur SOP ORG02-SD; 2016.
24. Leinert J. Einkommenselektion und ihre Folgen. In: Jacobs K, Klauber J, Leinert J, editors. *Fairer Wettbewerb oder Risikoselektion? Analysen zur gesetzlichen und privaten Krankenversicherung*. Bonn: Wissenschaftliches Institut der AOK; 2006. p. 31–48.
25. Lash TL, Fox MP, MacLehose RF, Maldonado G, McCandless LC, Greenland S. Good practices for quantitative bias analysis. *Int J Epidemiol*. 2014;43:1969–85. doi:10.1093/ije/dyu149.
26. Rothman KJ. *Epidemiology: An introduction*. 2nd ed. New York: Oxford University Press; 2012.
27. Langer S, Horn J, Kluttig A, Mikolajczyk R, Karrasch S, Schulz H, et al. Häufigkeit von Asthma bronchiale und Alter bei der Erstdiagnose – erste Ergebnisse der NAKO Gesundheitsstudie. [Occurrence of bronchial asthma and age at initial asthma diagnosis-first results of the German National Cohort]. *Bundesgesundheitsblatt Gesundheitsforschung Gesundheitsschutz*. 2020;63:397–403. doi:10.1007/s00103-020-03105-y.



28. Hoffmeyer-Slotnik JHP, Glemser A, Heckel C, Heyde C von der, Quitt H, Hanefeld U, et al. Statistik und Wissenschaft: Demographische Standards. Ausgabe 2010. 5th ed. Wiesbaden: Statistisches Bundesamt; 2010.
29. International Labour Organization. Entschließung I: Entschließung über Arbeitsstatistiken, Erwerbstätigkeit und die Unterauslastung des Arbeitskräfteangebots. 2014. [https://www.ilo.org/wcmsp5/groups/public/---dgreports/---stat/documents/normativeinstrument/wcms\\_235273.pdf](https://www.ilo.org/wcmsp5/groups/public/---dgreports/---stat/documents/normativeinstrument/wcms_235273.pdf). Accessed 17 Jul 2020.
30. Granato N. Mikrodaten-Tools: CASMIN-Bildungsklassifikation. Eine Umsetzung mit dem Mikrozensus 1996. Mannheim; 2000.
31. Bundesinstitut für Berufsbildung. Comparative Analysis of Social Mobility in Industrial Nations (CASMIN). <https://metadaten.bibb.de/klassifikation/16>. Accessed 17 Jul 2020.
32. Moons KGM, Altman DG, Reitsma JB, Ioannidis JPA, Macaskill P, Steyerberg EW, et al. Transparent Reporting of a multivariable prediction model for Individual Prognosis or Diagnosis (TRIPOD): explanation and elaboration. *Ann Intern Med*. 2015;162:W1-73. doi:10.7326/M14-0698.
33. Collins GS, Reitsma JB, Altman DG, Moons KGM. Transparent Reporting of a multivariable prediction model for Individual Prognosis or Diagnosis (TRIPOD): the TRIPOD statement. *Ann Intern Med*. 2015;162:55–63. doi:10.7326/M14-0697.
34. Moons KGM, Kengne AP, Woodward M, Royston P, Vergouwe Y, Altman DG, Grobbee DE. Risk prediction models: I. Development, internal validation, and assessing the incremental value of a new (bio)marker. *Heart*. 2012;98:683–90. doi:10.1136/heartjnl-2011-301246.
35. Steyerberg EW. *Clinical Prediction Models: A Practical Approach to Development, Validation and Updating*. 2nd ed. Cham: Springer Nature; 2019.
36. Austin PC, Steyerberg EW. Graphical assessment of internal and external calibration of logistic regression models by using loess smoothers. *Stat Med*. 2014;33:517–35. doi:10.1002/sim.5941.
37. TRIPOD Group. TRIPOD Checklist: Prediction Model Development. <https://www.tripod-statement.org/resources/>. Accessed 17 Jul 2020.

## List of abbreviations

AUC: Area Under the Curve; CAPI: Computer-assisted personal interview; CASMIN: Comparative Analysis of Social Mobility in Industrial Nations; EPV: Events per variable; ILO: International Labour Organization; NAKO: German National Cohort; PHI: Private health insurance; ROC curve: Receiver Operating Characteristic-Curve; SD: Standard deviation; SE: Standard error; SHI: Statutory health insurance; TRIPOD: Transparent Reporting of a multivariable prediction model for Individual Prognosis Or Diagnosis

## **Declarations**

### **Ethics approval and consent to participate**

The study protocol of the NAKO was approved by the ethics committee of the Bavarian State Medical Association (13023 and 13031) and by the locally responsible ethics committees of the institutions of the 18 study centres. All the described investigations were conducted in compliance with national law and in accordance with the declaration of Helsinki (in the latest revised version). All participants have been fully informed and have given their written informed consent to participate in the study.

### **Consent for publication**

Not applicable

### **Availability of data and materials**

The data that support the findings of this study are available from the German National Cohort but restrictions apply to the availability of these data, which were used under license for the current study, and so are not publicly available.

### **Competing interests**

The authors declare that they have no competing interests.

### **Funding**

This project was conducted with data from the German National Cohort (NAKO) ([www.nako.de](http://www.nako.de)). The NAKO is funded by the Federal Ministry of Education and Research (BMBF) [project funding reference numbers: 01ER1301A/B/C and 01ER1511D], federal states and the Helmholtz Association with additional financial support by the participating universities and the institutes of the Leibniz Association. We thank all participants who took part in the German National Cohort and the staff in this research program.

### **Authors' contributions**

ES, CS and IH conceptualised the study. HB1, HB2, ADM, WH, KHJ, NK, VK, TK, BK, ML, CMF, KM, RM, TN, IP, SS, BS, BW, SW, RW, ES and CS were responsible for data curation. CS did the data cleaning and created the final dataset. IH conducted the statistical analysis and wrote the original draft of the manuscript. CS and ES supervised IH. HB2, VK, TK, BK, CMF, RM, TN, IP, SS, CS and ES substantively revised the original draft of the manuscript. All authors read and approved the final manuscript.

## Acknowledgements

This article presents a translated part of the first author’s master’s thesis as a slightly modified version, initially written in the German language and bearing the following title: Entwicklung und interne Validierung von Prognosemodellen zur Vorhersage des Krankenversicherungsstatus von Teilnehmer\*innen der Basiserhebung der NAKO Gesundheitsstudie. Magdeburg, Berlin School of Public Health, 2020.

We would like to thank Christine Wallisch for her methodical consulting. Further, we are grateful to Ulrike Nimptsch for advice in the planning of the study.

## Additional Information

### Transparent Reporting of a multivariable prediction model for Individual Prognosis Or Diagnosis (TRIPOD)-Guidelines [37]

| Item                      | Checklist Item                                                                                                                                                                                      | Page |
|---------------------------|-----------------------------------------------------------------------------------------------------------------------------------------------------------------------------------------------------|------|
| Section/Topic             |                                                                                                                                                                                                     |      |
| Title and abstract        |                                                                                                                                                                                                     |      |
| Title                     | 1 Identify the study as developing and/or validating a multivariable prediction model, the target population, and the outcome to be predicted.                                                      | yes  |
| Abstract                  | 2 Provide a summary of objectives, study design, setting, participants, sample size, predictors, outcome, statistical analysis, results, and conclusions.                                           | yes  |
| Introduction              |                                                                                                                                                                                                     |      |
| Background and objectives | 3a Explain the medical context (including whether diagnostic or prognostic) and rationale for developing or validating the multivariable prediction model, including references to existing models. | 1-5  |
|                           | 3b Specify the objectives, including whether the study describes the development or validation of the model or both.                                                                                | 4    |
| Methods                   |                                                                                                                                                                                                     |      |
| Source of data            | 4a Describe the study design or source of data (e.g., randomized trial, cohort, or registry data), separately for the development and validation data sets, if applicable.                          | 6    |
|                           | 4b Specify the key study dates, including start of accrual; end of accrual; and, if applicable, end of follow-up.                                                                                   | 6    |

|                              |     |                                                                                                                                                                                                       |        |
|------------------------------|-----|-------------------------------------------------------------------------------------------------------------------------------------------------------------------------------------------------------|--------|
| Participants                 | 5a  | Specify key elements of the study setting (e.g., primary care, secondary care, general population) including number and location of centres.                                                          | 6      |
|                              | 5b  | Describe eligibility criteria for participants.                                                                                                                                                       | 6      |
|                              | 5c  | Give details of treatments received, if relevant.                                                                                                                                                     | N/A    |
| Outcome                      | 6a  | Clearly define the outcome that is predicted by the prediction model, including how and when assessed.                                                                                                | 6-7    |
|                              | 6b  | Report any actions to blind assessment of the outcome to be predicted.                                                                                                                                | N/A    |
| Predictors                   | 7a  | Clearly define all predictors used in developing or validating the multivariable prediction model, including how and when they were measured.                                                         | 7-8    |
|                              | 7b  | Report any actions to blind assessment of predictors for the outcome and other predictors.                                                                                                            | N/A    |
| Sample size                  | 8   | Explain how the study size was arrived at.                                                                                                                                                            | 6      |
| Missing data                 | 9   | Describe how missing data were handled (e.g., complete-case analysis, single imputation, multiple imputation) with details of any imputation method.                                                  | 10     |
| Statistical analysis methods | 10a | Describe how predictors were handled in the analyses.                                                                                                                                                 | 9      |
|                              | 10b | Specify type of model, all model-building procedures (including any predictor selection), and method for internal validation.                                                                         | 9-10   |
|                              | 10d | Specify all measures used to assess model performance and, if relevant, to compare multiple models.                                                                                                   | 10-12  |
| Risk groups                  | 11  | Provide details on how risk groups were created, if done.                                                                                                                                             | N/A    |
| <b>Results</b>               |     |                                                                                                                                                                                                       |        |
| Participants                 | 13a | Describe the flow of participants through the study, including the number of participants with and without the outcome and, if applicable, a summary of the follow-up time. A diagram may be helpful. | 13     |
|                              | 13b | Describe the characteristics of the participants (basic demographics, clinical features, available predictors), including the number of participants with missing data for predictors and outcome.    | 13-16  |
| Model development            | 14a | Specify the number of participants and outcome events in each analysis.                                                                                                                               | 16-21  |
|                              | 14b | If done, report the unadjusted association between each candidate predictor and outcome.                                                                                                              | N/A    |
| Model specification          | 15a | Present the full prediction model to allow predictions for individuals (i.e., all regression coefficients, and model intercept or baseline survival at a given time point).                           | 17-22  |
|                              | 15b | Explain how to use the prediction model.                                                                                                                                                              | 18, 22 |
| Model performance            | 16  | Report performance measures (with CIs) for the prediction model.                                                                                                                                      | 17-22  |
| <b>Discussion</b>            |     |                                                                                                                                                                                                       |        |
| Limitations                  | 18  | Discuss any limitations of the study (such as nonrepresentative sample, few events per predictor, missing data).                                                                                      | 27-28  |
| Interpretation               | 19b | Give an overall interpretation of the results, considering objectives, limitations, and results from similar studies, and other relevant evidence.                                                    | 25-29  |
| Implications                 | 20  | Discuss the potential clinical use of the model and implications for future research.                                                                                                                 | 29     |
| <b>Other information</b>     |     |                                                                                                                                                                                                       |        |
| Supplementary information    | 21  | Provide information about the availability of supplementary resources, such as study protocol, Web calculator, and data sets.                                                                         | iv-xv  |
| Funding                      | 22  | Give the source of funding and the role of the funders for the present study.                                                                                                                         | N/A    |
